# Supplementary material
Source: publisher figshare collection journal article supplement (https://acs.figshare.com/ndownloader/files/4712569)
Supplement: Supplementary file 1 [file 4712569]

data_General
_audit_creation_date                  '2004-09-13'
_audit_creation_method                'by CrystalStructure 3.6.0'
_audit_update_record                   ?

#==============================================================================

# PROCESSING SUMMARY (IUCr Office Use Only)

_journal_date_recd_electronic     ?
_journal_date_from_coeditor       ?
_journal_date_accepted            ?
_journal_coeditor_code            ?

#==============================================================================

# SUBMISSION DETAILS

_publ_contact_author_name             'Prof Seiki Saito'
_publ_contact_author_email            'seisaito@biotech.okayama-u.ac.jp'
_publ_contact_author_fax              '+81 86-251-8209'
_publ_contact_author_phone            '+81 86-251-8209'
_publ_contact_author_address          'Okayama Univ., Tsushima, Okayama, Jap.'
_publ_requested_journal               'J. Am. Chem. Soc.'
_publ_requested_category              'A'

#==============================================================================

# TITLE AND AUTHOR LIST

_publ_section_title
;
    Intramol Anionic D-A React of 1-Aryl-4-oxahepta-1,6-diyne Syst in DMSO
;
loop_
_publ_author_name
_publ_author_address
' Takayuki Kudoh '
;
FIRST AUTHORS ADDRESS  
; Okayama Univ, Tsushima, Okayama, Japan 700-8530
#==============================================================================

# SUPPORTING INFORMATION

_publ_section_references
;
   Rigaku/MSC and Rigaku Corporation. (2004).
   CrystalStructure 3.6.0.
   Single Crystal Structure Analysis Software.
   Rigaku/MSC, 9009 New Trails Drive, The Woodlands, TX, USA 77381-5209.
   Rigaku, 3-9-12 Akishima, Tokyo 196-8666, Japan.

   Watkin, D.J., Prout, C.K. Carruthers, J.R. & Betteridge, P.W. (1996)
   CRYSTALS Issue 10, Chemical Crystallography Laboratory, Oxford, UK.

;
_publ_section_figure_captions
;
  Figure 9. Chem-3D drawing of crystal structure of 56. 
;
_publ_section_exptl_prep
;
   from diethyl ether
;

#==============================================================================

data__Phenanthrene_____________

#==============================================================================

# CHEMICAL DATA

_chemical_formula_sum                  'C16 H12 O '
_chemical_formula_moiety               'C16 H12 O '
_chemical_formula_weight               220.27
_chemical_melting_point                 102

#==============================================================================

# CRYSTAL DATA
_symmetry_cell_setting                 triclinic
_symmetry_space_group_name_H-M        'P -1'
_symmetry_space_group_name_Hall       '-P 1'
_symmetry_Int_Tables_number            2
loop_
_symmetry_equiv_pos_site_id
_symmetry_equiv_pos_as_xyz
1   '+X,+Y,+Z'
2   '-X,-Y,-Z'

#------------------------------------------------------------------------------

_cell_length_a                         9.429(8)
_cell_length_b                         11.85(1)
_cell_length_c                         11.96(2)
_cell_angle_alpha                      69.63(4)
_cell_angle_beta                       66.86(7)
_cell_angle_gamma                      84.08(5)
_cell_volume                           1151(2)
_cell_formula_units_Z                  4
_cell_measurement_reflns_used          3014
_cell_measurement_theta_min            4.3
_cell_measurement_theta_max            66.6
_cell_measurement_temperature          293.1

#------------------------------------------------------------------------------

_exptl_crystal_density_diffrn          1.271
_exptl_crystal_F_000                   464.00
_exptl_absorpt_coefficient_mu          0.609
_exptl_absorpt_correction_type         none

#==============================================================================

# EXPERIMENTAL DATA

_diffrn_radiation_type                'Cu K\a'
_diffrn_radiation_wavelength           1.5419
_diffrn_measurement_device_type       'Rigaku RAXIS-RAPID'
_diffrn_measurement_method             \w
_diffrn_detector_area_resol_mean       10.00
_diffrn_reflns_number                  23256
_diffrn_reflns_av_R_equivalents        0.078
_diffrn_reflns_theta_max               68.04
_diffrn_measured_fraction_theta_max    0.9090
_diffrn_reflns_theta_full              68.04
_diffrn_measured_fraction_theta_full   0.9090
_diffrn_reflns_limit_h_min             -11
_diffrn_reflns_limit_h_max             11
_diffrn_reflns_limit_k_min             -14
_diffrn_reflns_limit_k_max             14
_diffrn_reflns_limit_l_min             -14
_diffrn_reflns_limit_l_max             14

#==============================================================================

# REFINEMENT DATA

_refine_special_details
;
    Refinement using reflections with F^2^ > 3.0 sigma(F^2^).
    The weighted R-factor(wR), goodness of fit (S) and R-factor (gt) are 
    based on F, with F set to zero for negative F. The threshold expression of
    F^2^ > 2.0 sigma(F^2^) is used only for calculating R-factor (gt).
;
_reflns_number_total                   3828
_reflns_number_gt                      1474
_reflns_threshold_expression           F^2^>2.0\s(F^2^)
_refine_ls_structure_factor_coef       F
_refine_ls_R_factor_gt                 0.0580
_refine_ls_wR_factor_ref               0.0560
_refine_ls_hydrogen_treatment          refall
_refine_ls_number_reflns               1474
_refine_ls_number_parameters           331
_refine_ls_goodness_of_fit_ref         5.358
_refine_ls_weighting_scheme            unit
_refine_ls_weighting_details
'w = 1.0'
_refine_ls_shift/su_max                0.0110
_refine_diff_density_max               0.17
_refine_diff_density_min               -0.13
_refine_ls_extinction_method           none
_refine_ls_extinction_coef             ?

loop_
_atom_type_symbol
_atom_type_description
_atom_type_scat_dispersion_real
_atom_type_scat_dispersion_imag
_atom_type_scat_source
  'C' 'C'  0.018 0.009 
;
International Tables for Crystallography
(1992, Vol. C, Tables 4.2.6.8 and 6.1.1.4)
;
  'H' 'H'  0.000 0.000 
;
International Tables for Crystallography
(1992, Vol. C, Table 6.1.1.4)
;
  'O' 'O'  0.049 0.032 
;
International Tables for Crystallography
(1992, Vol. C, Tables 4.2.6.8 and 6.1.1.4)
;

#==============================================================================

# ATOMIC COORDINATES AND THERMAL PARAMETERS

loop_
_atom_site_label
_atom_site_type_symbol
_atom_site_fract_x
_atom_site_fract_y
_atom_site_fract_z
_atom_site_U_iso_or_equiv
_atom_site_adp_type
_atom_site_occupancy
_atom_site_symmetry_multiplicity
_atom_site_calc_flag
_atom_site_refinement_flags
_atom_site_disorder_assembly
_atom_site_disorder_group
 O(1)   O  0.1755(8)   0.9196(7)   0.4221(6)   0.145(3)    Uani 1.00 1 d . . .
 O(2)   O  0.216(1)    0.4132(7)   1.4327(6)   0.151(4)    Uani 1.00 1 d . . .
 C(1)   C  0.2130(8)   0.9508(7)   -0.1062(7)  0.069(3)    Uani 1.00 1 d . . .
 C(2)   C  0.3263(8)   1.0377(7)   -0.1986(7)  0.083(3)    Uani 1.00 1 d . . .
 C(3)   C  0.3728(9)   1.0613(7)   -0.3301(8)  0.094(3)    Uani 1.00 1 d . . .
 C(4)   C  0.308(1)    0.9982(8)   -0.3757(8)  0.099(3)    Uani 1.00 1 d . . .
 C(5)   C  0.1930(9)   0.9125(8)   -0.2880(9)  0.092(3)    Uani 1.00 1 d . . .
 C(6)   C  0.1421(8)   0.8855(7)   -0.1509(8)  0.072(3)    Uani 1.00 1 d . . .
 C(7)   C  0.0256(9)   0.7934(7)   -0.0602(8)  0.082(3)    Uani 1.00 1 d . . .
 C(8)   C  -0.0152(8)  0.7661(6)   0.0696(8)   0.078(3)    Uani 1.00 1 d . . .
 C(9)   C  0.0536(8)   0.8280(6)   0.1187(8)   0.073(3)    Uani 1.00 1 d . . .
 C(10)  C  0.0106(9)   0.7942(7)   0.2550(7)   0.085(3)    Uani 1.00 1 d . . .
 C(11)  C  0.0802(9)   0.8570(7)   0.2992(8)   0.081(3)    Uani 1.00 1 d . . .
 C(12)  C  0.059(1)    0.8417(8)   0.4359(8)   0.115(4)    Uani 1.00 1 d . . .
 C(13)  C  0.2331(9)   1.0042(8)   0.2936(8)   0.104(3)    Uani 1.00 1 d . . .
 C(14)  C  0.1890(9)   0.9546(7)   0.2130(8)   0.079(3)    Uani 1.00 1 d . . .
 C(15)  C  0.2305(8)   0.9850(6)   0.0842(7)   0.075(3)    Uani 1.00 1 d . . .
 C(16)  C  0.1664(8)   0.9225(6)   0.0326(7)   0.064(2)    Uani 1.00 1 d . . .
 C(17)  C  0.3130(8)   0.4472(6)   0.8880(7)   0.069(2)    Uani 1.00 1 d . . .
 C(18)  C  0.2138(9)   0.5373(7)   0.8474(7)   0.083(3)    Uani 1.00 1 d . . .
 C(19)  C  0.205(1)    0.5632(8)   0.7292(8)   0.102(3)    Uani 1.00 1 d . . .
 C(20)  C  0.290(1)    0.499(1)    0.6469(9)   0.116(4)    Uani 1.00 1 d . . .
 C(21)  C  0.390(1)    0.4143(9)   0.682(1)    0.111(4)    Uani 1.00 1 d . . .
 C(22)  C  0.4013(9)   0.3874(8)   0.8028(9)   0.085(3)    Uani 1.00 1 d . . .
 C(23)  C  0.505(1)    0.2976(9)   0.839(1)    0.113(4)    Uani 1.00 1 d . . .
 C(24)  C  0.515(1)    0.2720(8)   0.956(1)    0.111(4)    Uani 1.00 1 d . . .
 C(25)  C  0.4253(9)   0.3288(7)   1.046(1)    0.086(3)    Uani 1.00 1 d . . .
 C(26)  C  0.437(1)    0.2979(8)   1.168(1)    0.106(4)    Uani 1.00 1 d . . .
 C(27)  C  0.348(1)    0.3529(8)   1.254(1)    0.098(4)    Uani 1.00 1 d . . .
 C(28)  C  0.335(1)    0.3359(9)   1.389(1)    0.122(4)    Uani 1.00 1 d . . .
 C(29)  C  0.165(1)    0.4841(8)   1.3342(8)   0.110(4)    Uani 1.00 1 d . . .
 C(30)  C  0.2459(9)   0.4388(7)   1.2231(8)   0.083(3)    Uani 1.00 1 d . . .
 C(31)  C  0.2341(8)   0.4719(6)   1.1063(7)   0.077(3)    Uani 1.00 1 d . . .
 C(32)  C  0.3229(8)   0.4174(6)   1.0136(7)   0.071(3)    Uani 1.00 1 d . . .
 H(1)   H  0.3734      1.0825      -0.1693     0.098       Uiso 1.00 1 c R . .
 H(2)   H  0.4501      1.1221      -0.3901     0.107       Uiso 1.00 1 c R . .
 H(3)   H  0.3408      1.0128      -0.4657     0.117       Uiso 1.00 1 c R . .
 H(4)   H  0.1452      0.8694      -0.3185     0.121       Uiso 1.00 1 c R . .
 H(5)   H  -0.0235     0.7518      -0.0912     0.102       Uiso 1.00 1 c R . .
 H(6)   H  -0.0906     0.7038      0.1289      0.094       Uiso 1.00 1 c R . .
 H(7)   H  -0.0637     0.7306      0.3127      0.102       Uiso 1.00 1 c R . .
 H(8)   H  0.0719      0.7604      0.4814      0.140       Uiso 1.00 1 c R . .
 H(9)   H  -0.0408     0.8655      0.4804      0.140       Uiso 1.00 1 c R . .
 H(10)  H  0.1879      1.0798      0.2923      0.130       Uiso 1.00 1 c R . .
 H(11)  H  0.3422      1.0139      0.2620      0.130       Uiso 1.00 1 c R . .
 H(12)  H  0.3038      1.0494      0.0267      0.093       Uiso 1.00 1 c R . .
 H(13)  H  0.1537      0.5795      0.9038      0.102       Uiso 1.00 1 c R . .
 H(14)  H  0.1407      0.6254      0.7031      0.127       Uiso 1.00 1 c R . .
 H(15)  H  0.2766      0.5141      0.5682      0.142       Uiso 1.00 1 c R . .
 H(16)  H  0.4513      0.3742      0.6237      0.132       Uiso 1.00 1 c R . .
 H(17)  H  0.5663      0.2564      0.7821      0.139       Uiso 1.00 1 c R . .
 H(18)  H  0.5851      0.2139      0.9784      0.136       Uiso 1.00 1 c R . .
 H(19)  H  0.5070      0.2386      1.1891      0.134       Uiso 1.00 1 c R . .
 H(20)  H  0.4291      0.3594      1.3866      0.153       Uiso 1.00 1 c R . .
 H(21)  H  0.3086      0.2542      1.4425      0.153       Uiso 1.00 1 c R . .
 H(22)  H  0.0563      0.4749      1.3627      0.138       Uiso 1.00 1 c R . .
 H(23)  H  0.1928      0.5665      1.3096      0.138       Uiso 1.00 1 c R . .
 H(24)  H  0.1653      0.5324      1.0859      0.095       Uiso 1.00 1 c R . .


loop_
_atom_site_aniso_label
_atom_site_aniso_U_11
_atom_site_aniso_U_22
_atom_site_aniso_U_33
_atom_site_aniso_U_12
_atom_site_aniso_U_13
_atom_site_aniso_U_23
 O(1)   0.162(6)    0.182(7)    0.110(5)    -0.039(5)   -0.071(5)   -0.038(5)  
 O(2)   0.197(8)    0.170(8)    0.108(5)    -0.010(6)   -0.086(6)   -0.035(5)  
 C(1)   0.052(5)    0.071(5)    0.082(5)    0.011(4)    -0.023(4)   -0.031(5)  
 C(2)   0.074(6)    0.091(6)    0.081(6)    0.002(5)    -0.025(5)   -0.030(5)  
 C(3)   0.086(6)    0.096(7)    0.086(6)    -0.007(5)   -0.021(5)   -0.024(5)  
 C(4)   0.085(7)    0.125(8)    0.084(6)    0.006(6)    -0.020(6)   -0.047(6)  
 C(5)   0.083(6)    0.107(7)    0.113(7)    0.033(5)    -0.048(6)   -0.067(6)  
 C(6)   0.073(5)    0.073(5)    0.089(6)    0.020(4)    -0.039(5)   -0.045(5)  
 C(7)   0.085(6)    0.068(5)    0.103(6)    0.000(4)    -0.035(5)   -0.040(5)  
 C(8)   0.066(5)    0.062(5)    0.107(6)    0.004(4)    -0.028(5)   -0.035(5)  
 C(9)   0.070(5)    0.053(5)    0.104(6)    0.003(4)    -0.039(5)   -0.029(5)  
 C(10)  0.096(6)    0.079(6)    0.081(6)    0.008(5)    -0.036(5)   -0.028(5)  
 C(11)  0.084(6)    0.075(6)    0.095(6)    0.019(4)    -0.043(5)   -0.035(5)  
 C(12)  0.126(8)    0.130(8)    0.095(6)    -0.016(6)   -0.049(6)   -0.030(6)  
 C(13)  0.100(7)    0.125(8)    0.100(6)    -0.008(5)   -0.046(6)   -0.042(6)  
 C(14)  0.084(6)    0.081(6)    0.088(6)    0.010(5)    -0.044(5)   -0.036(5)  
 C(15)  0.066(5)    0.072(6)    0.094(6)    0.008(4)    -0.038(5)   -0.031(5)  
 C(16)  0.058(5)    0.059(5)    0.087(5)    0.018(4)    -0.035(4)   -0.036(4)  
 C(17)  0.057(5)    0.066(5)    0.085(5)    -0.005(4)   -0.017(4)   -0.036(4)  
 C(18)  0.085(6)    0.088(6)    0.082(6)    0.001(5)    -0.034(5)   -0.034(5)  
 C(19)  0.129(8)    0.096(7)    0.091(6)    -0.015(6)   -0.051(6)   -0.029(6)  
 C(20)  0.111(8)    0.16(1)     0.088(7)    -0.050(7)   -0.021(6)   -0.053(7)  
 C(21)  0.079(7)    0.131(9)    0.119(8)    -0.029(6)   -0.002(6)   -0.071(7)  
 C(22)  0.073(6)    0.083(6)    0.102(6)    -0.021(5)   -0.010(5)   -0.053(6)  
 C(23)  0.074(7)    0.099(8)    0.18(1)     0.001(5)    -0.023(7)   -0.085(8)  
 C(24)  0.071(6)    0.080(7)    0.19(1)     0.006(5)    -0.046(7)   -0.059(8)  
 C(25)  0.067(5)    0.054(5)    0.150(8)    0.005(4)    -0.053(6)   -0.038(6)  
 C(26)  0.096(7)    0.075(7)    0.163(9)    -0.008(5)   -0.084(7)   -0.015(7)  
 C(27)  0.104(8)    0.075(7)    0.127(8)    -0.023(5)   -0.070(7)   -0.010(6)  
 C(28)  0.15(1)     0.104(8)    0.129(9)    -0.033(7)   -0.094(8)   0.001(7)   
 C(29)  0.129(8)    0.130(8)    0.085(6)    -0.018(6)   -0.053(6)   -0.033(6)  
 C(30)  0.091(6)    0.086(6)    0.083(6)    -0.014(5)   -0.045(5)   -0.024(5)  
 C(31)  0.071(5)    0.072(6)    0.094(5)    0.002(4)    -0.035(5)   -0.033(5)  
 C(32)  0.066(5)    0.060(5)    0.094(5)    -0.004(4)   -0.037(5)   -0.026(4)  

#==============================================================================

_computing_data_collection            'PROCESS-AUTO'
_computing_cell_refinement            'PROCESS-AUTO'
_computing_data_reduction             'CrystalStructure'
_computing_structure_solution         'DirectMethod'
_computing_structure_refinement       'CRYSTALS'
_computing_publication_material       'CrystalStructure 3.6.0'

#==============================================================================

#     End of CIF

#==============================================================================
